# Supplementary material for: The effects of extra PCR cycles when amplifying skeletal samples with the GlobalFiler® PCR Amplification Kit
Source: Springer Nature journal article supplement (doi:10.1007/s00414-018-1860-2), 2018-05-29
Supplement: MOESM5 [file 15800224]

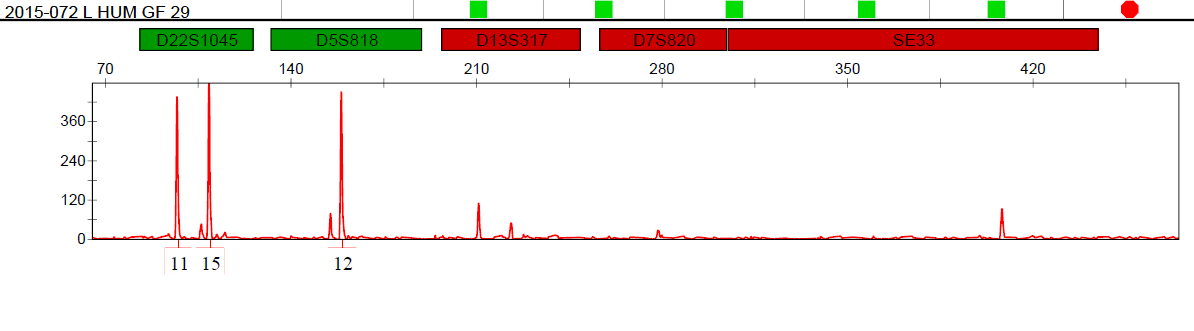

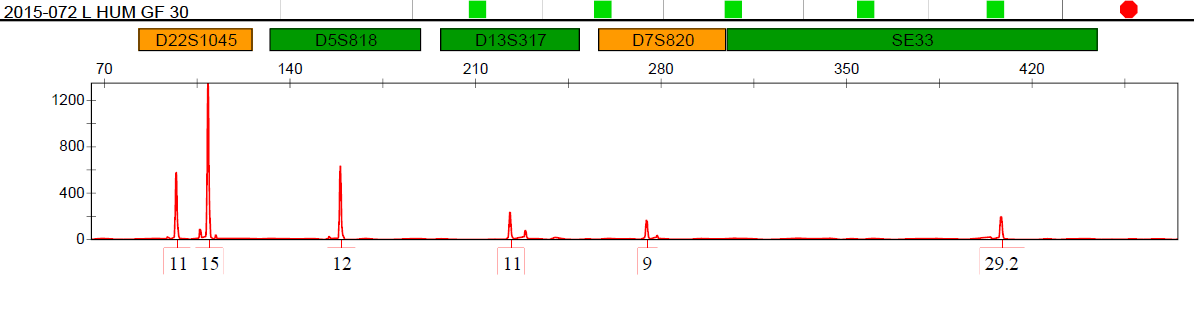

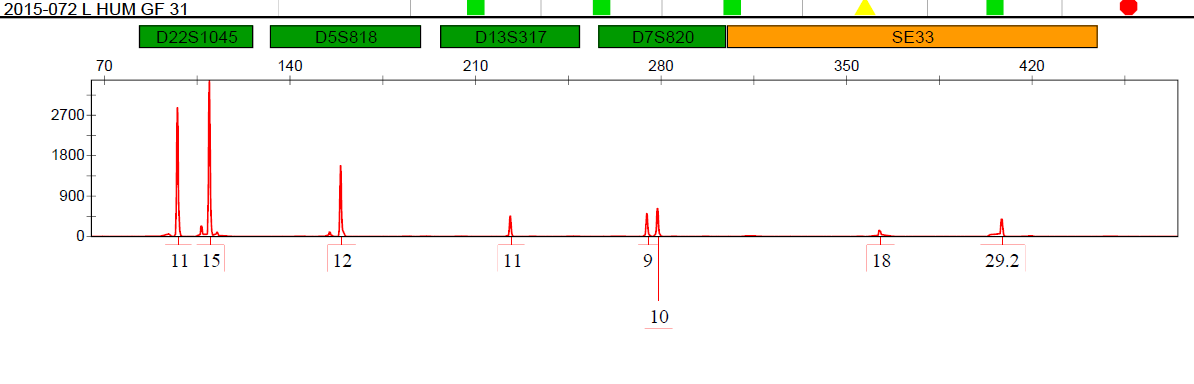

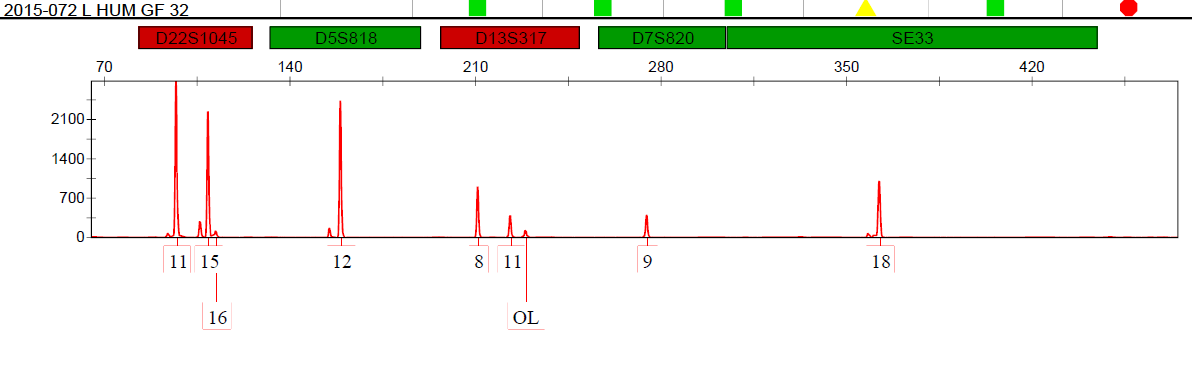


**a**

**a**

**b**

**e**

**c**

**c**

**c**

**c**

**c**

**c**

**b**

**a**

**d**

Cycle #: **30**

# Dropped Out Alleles: **3**

# Artifacts: **0**

Cycle #: **31**

# Dropped Out Alleles: **1**

# Artifacts: **0**

Cycle #: **32**

# Dropped Out Alleles: **2**

# Artifacts: **2**

Cycle #: **29**

# Dropped Out Alleles: **6**

# Artifacts: **0**

**Online Resource 5** – A representative electropherogram (red channel only) for one buried Humerus sample (0.064 ng) amplified with 29, 30, 31, and 32 cycles using the GlobalFiler® PCR amplification kit. Stochastic effects and other artifacts are labeled as follows: a) locus dropout, b) peak height imbalance, c) allele dropout, d) exaggerated stutter, e) off-ladder peak.
